# Supplementary material
Source: HighWire-hosted journal article supplement (http://www.qdcxjkg.com/highwire/filestream/113654/field_highwire_adjunct_files/1/Annex_I_-_for_authors_with_galley_corrected_version.pdf)
Supplement: Annex_I_-_for_authors_with_galley_corrected_version.pdf [file Annex_I_-_for_authors_with_galley_corrected_version.pdf]

Annex 1: Standard tool to perform the clinical survey

1 per patient

| Part I                                   |                                                                                          | Result/comment |
|------------------------------------------|------------------------------------------------------------------------------------------|----------------|
| General Information                      | Name of the Unit audited                                                                 |                |
|                                          | Location                                                                                 |                |
|                                          | Country                                                                                  |                |
| Country information                      | Notified incidence (overall x 100.000)                                                   |                |
|                                          | Notified incidence (SS+ x 100.000)                                                       |                |
|                                          | Notified number of MDR                                                                   |                |
|                                          | Notified number of XDR                                                                   |                |
|                                          | Estimated number of MDR                                                                  |                |
|                                          | Estimated number of XDR                                                                  |                |
| Department Administrative Information    | Kind of Department                                                                       |                |
|                                          | Overall number of beds                                                                   |                |
|                                          | Number of TB beds                                                                        |                |
|                                          | Total number of TB cases admitted in 2008                                                |                |
|                                          | How many cases from OPD?                                                                 |                |
|                                          | How many cases referred from External Health Units?                                      |                |
|                                          | Total number of MDR cases admitted in 2008                                               |                |
|                                          | Total number of XDR cases admitted in 2008                                               |                |
|                                          | Total number of TB/HIV cases admitted in 2008                                            |                |
|                                          | Average proportion (%) of bed used (average n. of patients day/ average n. of beds day ) |                |
|                                          | Total number of physicians in 2008                                                       |                |
|                                          | Total number of nurses in 2008                                                           |                |
|                                          | Total number of rooms                                                                    |                |
|                                          | Total number of rooms with 1 bed                                                         |                |
|                                          | Total number of rooms with 2 beds                                                        |                |
| Total number of rooms with $\geq 3$ beds |                                                                                          |                |
| Department Infection Control information | Negative pressure ventilation available                                                  |                |
|                                          | Negative pressure ventilation available (specify details)                                |                |
|                                          | Are ACH (Air Changes per Hour) measured?                                                 |                |
|                                          | Are infection control administrative measures in place?                                  |                |
|                                          | Describe which administrative infection control measures are in place                    |                |
|                                          | Are patients wearing surgical masks?                                                     |                |
|                                          | Are staff wearing FP2 respirators?                                                       |                |
|                                          | Are visitors wearing FP2 respirators?                                                    |                |
|                                          | Did staff undergo respirator fit testing?                                                |                |
|                                          | Was an infection control training organized for all staff?                               |                |
|                                          | When was an infection control training organized for all staff?                          |                |
|                                          | Is an infection control committee in place?                                              |                |
|                                          | How many staff had TB in the last 10 years?                                              |                |
|                                          | How many staff had MDR in the last 10 years?                                             |                |
|                                          | Number of Respiratory isolation room                                                     |                |
|                                          | Total number of single rooms                                                             |                |
|                                          | Total number of double rooms                                                             |                |
| Laboratory information                   | How many SS are managed in one year? (2008)                                              |                |
|                                          | How many SS are positive in one year? (2008)                                             |                |

|  |                                                             |  |
|--|-------------------------------------------------------------|--|
|  | <b>How many Cultures are positive in one year? (2008)</b>   |  |
|  | <b>How many DST are done in one year? (2008)</b>            |  |
|  | <b>How many DST are pan-susceptible in one year? (2008)</b> |  |
|  | <b>How many DST are mono-resistant in one year? (2008)</b>  |  |
|  | <b>How many DST are poly-resistant in one year? (2008)</b>  |  |
|  | <b>How many DST are MDR in one year? (2008)</b>             |  |
|  | <b>How many DST are XDR in one year? (2008)</b>             |  |
|  | <b>Is the laboratory:</b>                                   |  |
|  | <b>Is an external Quality Assurance (QA) in place?</b>      |  |
|  | <b>QA Under NRL</b>                                         |  |
|  | <b>(QA) Under WHO SRL</b>                                   |  |
|  | <b>Location SRL</b>                                         |  |
|  | <b>Culture methods</b>                                      |  |
|  | <b>Type of liquid technology</b>                            |  |
|  | <b>NAAT</b>                                                 |  |
|  | <b>NAAT methodology</b>                                     |  |
|  | <b>NAAT frequency</b>                                       |  |

1 per patient

| Part 2                                      |                                                                                         | Result/<br>comment |
|---------------------------------------------|-----------------------------------------------------------------------------------------|--------------------|
| Identification                              | Institution patient number                                                              |                    |
|                                             | Date of admission in the hospital                                                       |                    |
|                                             | Case definition                                                                         |                    |
| Current TB diagnosis                        | Date of current TB diagnosis                                                            |                    |
|                                             | Date of current MDR/XDR-TB diagnosis                                                    |                    |
|                                             | Duration of symptoms till diagnosis                                                     |                    |
|                                             | Type of pulmonary TB                                                                    |                    |
|                                             | Extra-pulmonary TB                                                                      |                    |
|                                             | Microscopy material examined                                                            |                    |
|                                             | Result microscopy: neg or # positive                                                    |                    |
|                                             | Culture material examined                                                               |                    |
|                                             | Result culture: Neg /N. of days (lower of 3) liquid/ N. of colonies (higher of 3) solid |                    |
|                                             | Chest X-ray result:                                                                     |                    |
|                                             | Bronchoscopy                                                                            |                    |
|                                             | CT scan                                                                                 |                    |
|                                             | NAAT                                                                                    |                    |
|                                             | Mantoux done                                                                            |                    |
|                                             | Mantoux type (RT23, other specify)                                                      |                    |
|                                             | Mantoux dose (5IU, other specify)                                                       |                    |
|                                             | Mantoux reading method (induration mm, average 2 diameters; other specify)              |                    |
|                                             | Result of the Mantoux                                                                   |                    |
|                                             | IGRAs done                                                                              |                    |
|                                             | IGRA type(ELISPOT, Quantiferon, Quantiferon GOLD, other specify)                        |                    |
|                                             | IGRAs result                                                                            |                    |
|                                             | Other examination/s                                                                     |                    |
|                                             | Describe other examination/s                                                            |                    |
|                                             | Isolation room (days)                                                                   |                    |
| Surgical mask adopted by the patient        |                                                                                         |                    |
| Respirator adopted by the patient           |                                                                                         |                    |
| Patient characteristics and medical history | Date of birth                                                                           |                    |
|                                             | Gender                                                                                  |                    |
|                                             | Country of birth                                                                        |                    |
|                                             | Country of residence                                                                    |                    |
|                                             | Province of residence                                                                   |                    |
|                                             | Year of entry in the country                                                            |                    |
|                                             | Employment status                                                                       |                    |
|                                             | Homeless                                                                                |                    |
|                                             | IV drug user                                                                            |                    |
|                                             | Current smoker                                                                          |                    |
|                                             | Ex-smoker                                                                               |                    |
|                                             | Pack/yr: cigarettes/day x years                                                         |                    |
|                                             | Current alcohol abuser                                                                  |                    |
|                                             | EX-alcohol abuser                                                                       |                    |
|                                             | Alcohol/day x time                                                                      |                    |
| Incarcerated                                |                                                                                         |                    |

|                                                              |                                                                 |                                      |
|--------------------------------------------------------------|-----------------------------------------------------------------|--------------------------------------|
|                                                              | Known contact of a TB case                                      |                                      |
|                                                              | Resistance status contact                                       |                                      |
|                                                              | Resistance status contact, if yes specify DST                   |                                      |
|                                                              | BCG vaccinated                                                  |                                      |
| Previous history of TB                                       | Previous diagnosis of TB                                        |                                      |
|                                                              | Previous DST results (in case of multiple ones, specify)        |                                      |
|                                                              | Previous result of Tuberculin Skin Testing                      |                                      |
|                                                              | Previous result of IGRA                                         |                                      |
|                                                              | Previous Chest X-ray result                                     |                                      |
|                                                              | Treatment following previous diagnosis (regimen)                |                                      |
|                                                              | N. of previous anti-TB treatment > 1 month                      |                                      |
|                                                              | N. of months between last treatment > 1 and current diagnosis   |                                      |
|                                                              | Treatment outcome of last TB treatment before current diagnosis |                                      |
|                                                              | Previous pulmonary surgery                                      |                                      |
|                                                              | Drug resistance                                                 | Current DST (N° resistance detected) |
| Date of DST result 1° line available:                        |                                                                 |                                      |
| Date of DST result 2° line available                         |                                                                 |                                      |
| At current diagnosis resistant to isoniazid                  |                                                                 |                                      |
| At current diagnosis resistant to rifampicin                 |                                                                 |                                      |
| At current diagnosis resistant to ethambutol                 |                                                                 |                                      |
| At current diagnosis resistant to streptomycin               |                                                                 |                                      |
| At current diagnosis resistant to pyrazinamide               |                                                                 |                                      |
| At current diagnosis resistant to ethionamide /prothionamide |                                                                 |                                      |
| At current diagnosis resistant to kanamycin                  |                                                                 |                                      |
| At current diagnosis resistant to cycloserine                |                                                                 |                                      |
| At current diagnosis resistant to capreomycin                |                                                                 |                                      |
| At current diagnosis resistant to PAS                        |                                                                 |                                      |
| At current diagnosis resistant to amikacin                   |                                                                 |                                      |
| At current diagnosis resistant to rifabutin                  |                                                                 |                                      |
| At current diagnosis resistant to ciprofloxacin              |                                                                 |                                      |
| At current diagnosis resistant to moxifloxacin               |                                                                 |                                      |
| At current diagnosis resistant to ofloxacin                  |                                                                 |                                      |
| At current diagnosis resistant to levofloxacin               |                                                                 |                                      |
| At current diagnosis resistant to linezolid                  |                                                                 |                                      |
| At current diagnosis resistant to clarithromycin             |                                                                 |                                      |
| At current diagnosis resistant to amoxi/clavulanate          |                                                                 |                                      |
|                                                              | At current diagnosis resistant to Clofazimine                   |                                      |
|                                                              | At current diagnosis resistant to azithromycin                  |                                      |
| Comorbidities                                                | HIV test offered                                                |                                      |
|                                                              | HIV test performed                                              |                                      |
|                                                              | HIV status at current diagnosis                                 |                                      |
|                                                              | CD4-cell count at current diagnosis                             |                                      |
|                                                              | Plasma HIV-RNA at current diagnosis                             |                                      |
|                                                              | Diabetes                                                        |                                      |
|                                                              | Silicosis                                                       |                                      |
|                                                              | Chronic hepatitis B                                             |                                      |
| Chronic hepatitis C                                          |                                                                 |                                      |
|                                                              | Others: specify                                                 |                                      |
| Hospital stay (total n. of                                   | Hospital stay                                                   |                                      |

|                                                        |                                                               |  |
|--------------------------------------------------------|---------------------------------------------------------------|--|
| days)                                                  | Total n. of days in hospital                                  |  |
| Prescribed drugs                                       | Anti-TB regimen                                               |  |
|                                                        | Adverse events of anti-TB drugs                               |  |
|                                                        | Adverse events of anti-TB drugs: specify which drug           |  |
|                                                        | Notes on treatment                                            |  |
|                                                        | Body weight at admission (kg)                                 |  |
|                                                        | Isoniazid, dose prescribed in mg                              |  |
|                                                        | Rifampicin, dose prescribed in mg                             |  |
|                                                        | Ethambutol, dose prescribed in mg                             |  |
|                                                        | Streptomycin, dose prescribed in mg                           |  |
|                                                        | Pyrazinamide, dose prescribed in mg                           |  |
|                                                        | Ethionamide /Prothionamide, dose prescribed in mg             |  |
|                                                        | Kanamycin, dose prescribed in mg                              |  |
|                                                        | Cycloserine, dose prescribed in mg                            |  |
|                                                        | Capreomycin, dose prescribed in mg                            |  |
|                                                        | PAS, dose prescribed in mg                                    |  |
|                                                        | Amikacin, dose prescribed in mg                               |  |
|                                                        | Rifabutin, dose prescribed in mg                              |  |
|                                                        | Ciprofloxacin, dose prescribed in mg                          |  |
|                                                        | Moxifloxacin, dose prescribed in mg                           |  |
|                                                        | Ofloxacin, dose prescribed in mg                              |  |
|                                                        | Levofloxacin, dose prescribed in mg                           |  |
|                                                        | Linezolid, dose prescribed in mg                              |  |
|                                                        | Clofazimine, dose prescribed in mg                            |  |
|                                                        | Meropenem, dose prescribed in mg                              |  |
|                                                        | Imipenem, dose prescribed in mg                               |  |
|                                                        | Amox/Clavul, dose prescribed in mg                            |  |
|                                                        | Other...dose prescribed in mg                                 |  |
|                                                        | Describe any deviation form Standard dosages of anti-TB drugs |  |
|                                                        | Anti-HIV regimen                                              |  |
|                                                        | Adverse events of anti-HIV drugs                              |  |
| Dosages of anti-HIV drugs adequate                     |                                                               |  |
| Dosages of anti-HIV drugs adequate: specify which drug |                                                               |  |
| Pharmacokinetics performed for anti-TB drugs           |                                                               |  |
| Pharmacokinetics performed for anti-HIV drugs          |                                                               |  |
| Surgery at current diagnosis                           | Surgery at current diagnosis                                  |  |
| Treatment monitoring                                   | Month 2 SS                                                    |  |
|                                                        | Month 2 C                                                     |  |
|                                                        | Month 5 SS                                                    |  |
|                                                        | Month 5 C                                                     |  |
|                                                        | Month 7 SS                                                    |  |
|                                                        | Month 7 C                                                     |  |
|                                                        | End SS                                                        |  |
|                                                        | End C                                                         |  |
|                                                        | If MDR, Laserson's criteria                                   |  |
| Outcome                                                | Time to SS conversion (days from start treatment)             |  |
|                                                        | Time to culture conversion (days)                             |  |
|                                                        | Final outcome (Laserson) : Ongoing                            |  |

|                  |                                             |  |
|------------------|---------------------------------------------|--|
| <b>Follow-up</b> | Plan of follow-up in an out-patient setting |  |
|                  | Notes                                       |  |

**1 per patient**

| <b>Part 3</b>               |                                                               | <b>Result/comment</b> |
|-----------------------------|---------------------------------------------------------------|-----------------------|
|                             | <b>Institution patient number</b>                             |                       |
| <b>Medical history</b>      | <b>Investigation previous TB diagnosis</b>                    |                       |
|                             | <b>Investigation previous DST</b>                             |                       |
|                             | <b>Investigation previous treatment</b>                       |                       |
|                             | <b>Investigation contacts</b>                                 |                       |
| <b>Diagnosis</b>            | <b>Diagnostic algorithm</b>                                   |                       |
|                             | <b>Microbiology</b>                                           |                       |
|                             | <b>Other examinations</b>                                     |                       |
|                             | <b>Final decision</b>                                         |                       |
| <b>Treatment</b>            | <b>TB regimen choice (4 active drugs ensured)</b>             |                       |
|                             | <b>Dosage</b>                                                 |                       |
|                             | <b>Duration</b>                                               |                       |
|                             | <b>Management adverse events TB treatment</b>                 |                       |
|                             | <b>HIV regimen choice</b>                                     |                       |
|                             | <b>Management adverse events HIV treatment</b>                |                       |
| <b>Treatment monitoring</b> | <b>Necessary examinations performed</b>                       |                       |
| <b>Outcome</b>              | <b>Correct outcome assigned</b>                               |                       |
| <b>Infection control</b>    | <b>Administrative measures adequate</b>                       |                       |
|                             | <b>Environmental measures adequate</b>                        |                       |
|                             | <b>Infection control committee</b>                            |                       |
|                             | <b>Surveillance system for drug-resistance in the setting</b> |                       |
|                             | <b>Staff personal protective measures adequate</b>            |                       |
|                             | <b>Cough etiquette</b>                                        |                       |
|                             | <b>Availability of respirators</b>                            |                       |
|                             | <b>Training of the staff on infection control</b>             |                       |
|                             | <b>Remarks</b>                                                |                       |
